# Supplementary material for: An mHealth App for Supporting Quitters to Manage Cigarette Cravings With Short Bouts of Physical Activity: A Randomized Pilot Feasibility and Acceptability Study
Source: PubMed Central journal article supplement (PMC5466703; doi:10.2196/mhealth.6252), 2017-05-26
Supplement: mhealth_v5i5e74_app3.pdf [file mhealth_v5i5e74_app3.pdf]

|                                                                 | Time points     |                 |                 |                |                |     |                            |     |                            |     |                            |     |                            |     |                            |     |                             |     |                             |     |     |     |
|-----------------------------------------------------------------|-----------------|-----------------|-----------------|----------------|----------------|-----|----------------------------|-----|----------------------------|-----|----------------------------|-----|----------------------------|-----|----------------------------|-----|-----------------------------|-----|-----------------------------|-----|-----|-----|
|                                                                 | -t <sub>3</sub> | -t <sub>2</sub> | -t <sub>1</sub> | t <sub>0</sub> | t <sub>1</sub> |     | t <sub>2</sub> (3d. after) |     | t <sub>3</sub> (1w. after) |     | t <sub>4</sub> (2w. after) |     | t <sub>5</sub> (3w. after) |     | t <sub>6</sub> (4w. after) |     | t <sub>7</sub> (12w. after) |     | t <sub>8</sub> (24w. after) |     |     |     |
|                                                                 | All             | All             | All             | All            | Com            | Exp | Com                        | Exp | Com                        | Exp | Com                        | Exp | Com                        | Exp | Com                        | Exp | Com                         | Exp | Com                         | Exp | Com | Exp |
| <b>Screening for eligibility</b>                                |                 |                 |                 |                |                |     |                            |     |                            |     |                            |     |                            |     |                            |     |                             |     |                             |     |     |     |
| <b>Intervention to quit Smoking (Session 1 &amp; 3)</b>         |                 |                 |                 |                |                |     |                            |     |                            |     |                            |     |                            |     |                            |     |                             |     |                             |     |     |     |
| <b>Quit day: Allocation</b>                                     |                 |                 |                 |                |                |     |                            |     |                            |     |                            |     |                            |     |                            |     |                             |     |                             |     |     |     |
| <b>Intervention to manage cravings (4<sup>th</sup> session)</b> |                 |                 |                 |                |                |     |                            |     |                            |     |                            |     |                            |     |                            |     |                             |     |                             |     |     |     |
| <b>Follow-up</b>                                                |                 |                 |                 |                |                |     |                            |     |                            |     |                            |     |                            |     |                            |     |                             |     |                             |     |     |     |
| <b>Measures</b>                                                 |                 |                 |                 |                |                |     |                            |     |                            |     |                            |     |                            |     |                            |     |                             |     |                             |     |     |     |
| Screening for Drug Use                                          | x               |                 |                 |                |                |     |                            |     |                            |     |                            |     |                            |     |                            |     |                             |     |                             |     |     |     |
| Tobacco Dependence Screener                                     | x               |                 |                 |                |                |     |                            |     |                            |     |                            |     |                            |     |                            |     |                             |     |                             |     |     |     |
| Motivation to Stop Smoking Scale                                | x               |                 |                 |                |                |     |                            |     |                            |     |                            |     |                            |     |                            |     |                             |     |                             |     |     |     |
| General Health Questionnaire                                    | x               |                 |                 |                |                |     |                            |     |                            |     |                            |     |                            |     |                            |     |                             |     |                             |     |     |     |
| Physical Activity Readiness Questionnaire                       | x               |                 |                 |                |                |     |                            |     |                            |     |                            |     |                            |     |                            |     |                             |     |                             |     |     |     |
| Smoking behavior 7days                                          |                 | x               | x               |                | x              | x   |                            |     |                            |     |                            |     |                            |     |                            |     |                             |     |                             |     |     |     |
| 7-day PPA                                                       |                 |                 |                 |                |                |     | x                          | x   | x                          | x   | x                          | x   | x                          | x   | x                          | x   | x                           | x   | x                           | x   | x   | x   |
| International Physical Activity Questionnaire                   |                 | x               | x               |                |                |     |                            |     |                            |     |                            |     |                            |     |                            |     |                             |     |                             |     | x   | x   |
| Power of control on manage cravings                             |                 | x               | x               |                |                |     | x                          | x   |                            |     |                            |     |                            |     |                            |     | x                           | x   | x                           | x   | x   | x   |
| Efficacy on being aware of experience cravings                  |                 | x               |                 |                | x              | x   | x                          | x   | x                          | x   | x                          | x   | x                          | x   | x                          | x   | x                           | x   | x                           | x   | x   | x   |
| Efficacy on managing cravings                                   |                 | x               |                 |                | x              | x   | x                          | x   | x                          | x   | x                          | x   | x                          | x   | x                          | x   | x                           | x   | x                           | x   | x   | x   |
| Number of relapses last 7days                                   |                 |                 |                 |                | x              | x   | x                          | x   | x                          | x   | x                          | x   | x                          | x   | x                          | x   | x                           | x   | x                           | x   | x   | x   |
| Number of cravings last 7days                                   |                 |                 |                 |                | x              | x   | x                          | x   | x                          | x   | x                          | x   | x                          | x   | x                          | x   | x                           | x   | x                           | x   | x   | x   |
| TPB physical activity (attitude, PBC & intention)               |                 | x               |                 |                | x              | x   |                            |     |                            |     |                            |     |                            |     |                            |     |                             |     |                             |     |     |     |
| Cotinine in saliva                                              |                 |                 |                 |                | x              | x   |                            |     |                            |     |                            |     |                            |     |                            |     |                             |     |                             |     |     | x   |
| Fidelity check (Comparison group)                               |                 |                 |                 |                |                |     | x                          |     | x                          |     |                            |     |                            |     |                            | x   |                             | x   |                             | x   |     | x   |
| Fidelity check (Experimental group)                             |                 |                 |                 |                |                |     |                            | x   |                            | x   |                            |     |                            |     |                            | x   |                             | x   |                             | x   |     | x   |
| Data from Ph.o.S app collection mechanism                       |                 |                 |                 |                |                |     |                            | x   |                            | x   |                            |     | x                          |     | x                          |     | x                           |     | x                           |     | x   | x   |
| Ph.o.S app Usability                                            |                 |                 |                 |                |                |     |                            |     |                            | x   |                            |     |                            |     |                            | x   |                             |     |                             |     |     |     |

All = All participants; Com = Comparison group; Exp = Experimental group; PBC =Perceived behavioral control
