# Supplementary material for: An mHealth App for Supporting Quitters to Manage Cigarette Cravings With Short Bouts of Physical Activity: A Randomized Pilot Feasibility and Acceptability Study
Source: PubMed Central journal article supplement (PMC5466703; doi:10.2196/mhealth.6252), 2017-05-26
Supplement: mhealth_v5i5e74_app4.pdf [file mhealth_v5i5e74_app4.pdf]

| Time    | Group        | Intention to treat     |                    |                | Complete case          |                    |                |
|---------|--------------|------------------------|--------------------|----------------|------------------------|--------------------|----------------|
|         |              | Non-abstinent<br>N (%) | Abstinent<br>N (%) | Total<br>N (%) | Non-abstinent<br>N (%) | Abstinent<br>N (%) | Total<br>N (%) |
| 1 week  | Experimental | 6 (24%)                | 19 (76%)           | 25<br>(100%)   | 6 (24%)                | 19 (76%)           | 25 (100%)      |
|         | Comparison   | 9 (47.4%)              | 10 (52.6%)         | 19<br>(100%)   | 9 (47.4%)              | 10 (52.6%)         | 19 (100%)      |
|         | Total        | 15 (34.1%)             | 29 (65.9%)         | 44<br>(100%)   | 15 (34.1%)             | 29 (65.9%)         | 44 (100%)      |
| 2 weeks | Experimental | 11 44.0%               | 14 56.0%           | 25<br>100.0%   | 7 33.3%                | 14 66.7%           | 21 (100.0%)    |
|         | Comparison   | 9 47.4%                | 10 52.6%           | 19<br>100.0%   | 8 44.4%                | 10 55.6%           | 18<br>100.0%   |
|         | Total        | 20 45.5%               | 24 54.5%           | 44<br>100.0%   | 15 38.5%               | 24 61.5%           | 39<br>100.0%   |
| 3 weeks | Experimental | 8<br>32.0%             | 17<br>68.0%        | 25<br>100.0%   | 6<br>26.1%             | 17<br>73.9%        | 23<br>100.0%   |
|         | Comparison   | 6<br>31.6%             | 13<br>68.4%        | 19<br>100.0%   | 5<br>27.8%             | 13<br>72.2%        | 18<br>100.0%   |
|         | Total        | 14<br>31.8%            | 30<br>68.2%        | 44<br>100.0%   | 11<br>26.8%            | 30<br>73.2%        | 41<br>100.0%   |
| 4 weeks | Experimental | 9<br>36.0%             | 16<br>64.0%        | 25<br>100.0%   | 6<br>27.3%             | 16<br>72.7%        | 22<br>100.0%   |
|         | Comparison   | 6<br>31.6%             | 13<br>68.4%        | 19<br>100.0%   | 6<br>31.6%             | 13<br>68.4%        | 19<br>100.0%   |
|         | Total        | 15<br>34.1%            | 29<br>65.9%        | 44<br>100.0%   | 12<br>29.3%            | 29<br>70.7%        | 41<br>100.0%   |
| 8 weeks | Experimental | 13<br>52.0%            | 12<br>48.0%        | 25<br>100.0%   | 7<br>36.8%             | 12<br>63.2%        | 19<br>100.0%   |
|         | Comparison   | 7<br>36.8%             | 12<br>63.2%        | 19<br>100.0%   | 4<br>25.0%             | 12<br>75.0%        | 16<br>100.0%   |
|         | Total        | 20                     | 24                 | 44             | 11                     | 24                 | 35             |

|             |              |       |       |        |       |       |        |
|-------------|--------------|-------|-------|--------|-------|-------|--------|
|             |              | 45.5% | 54.5% | 100.0% | 31.4% | 68.6% | 100.0% |
| 12<br>weeks | Experimental | 19    | 6     | 25     | 11    | 6     | 17     |
|             |              | 76.0% | 24.0% | 100.0% | 64.7% | 35.3% | 100.0% |
|             | Comparison   | 10    | 9     | 19     | 6     | 9     | 15     |
|             |              | 52.6% | 47.4% | 100.0% | 40.0% | 60.0% | 100.0% |
|             | Total        | 29    | 15    | 44     | 17    | 15    | 32     |
|             |              | 65.9% | 34.1% | 100.0% | 53.1% | 46.9% | 100.0% |
| 24<br>weeks | Experimental | 16    | 9     | 25     | 6     | 9     | 15     |
|             |              | 64.0% | 36.0% | 100.0% | 40.0% | 60.0% | 100.0% |
|             | Comparison   | 12    | 7     | 19     | 8     | 7     | 15     |
|             |              | 63.2% | 36.8% | 100.0% | 53.3% | 46.7% | 100.0% |
|             | Total        | 28    | 16    | 44     | 14    | 16    | 30     |
|             |              | 63.6% | 36.4% | 100.0% | 46.7% | 53.3% | 100.0% |
