# Supplementary material for: An mHealth App for Supporting Quitters to Manage Cigarette Cravings With Short Bouts of Physical Activity: A Randomized Pilot Feasibility and Acceptability Study
Source: PubMed Central journal article supplement (PMC5466703; doi:10.2196/mhealth.6252), 2017-05-26
Supplement: mhealth_v5i5e74_app5.pdf [file mhealth_v5i5e74_app5.pdf]

| Follow up<br>time points | Group        | Mean (SD)     |               |             |             |             |
|--------------------------|--------------|---------------|---------------|-------------|-------------|-------------|
|                          |              | Relapses      | Cravings      | AEF         | MCEF        | CCM         |
| 1 week                   | Comparison   | .48 (1.00)    | 34.15 (60.32) | 9.21 (.91)  | 8.05 (1.84) | 4.19 (1.39) |
|                          | Experimental | .68 (.88)     | 21.21 (28.03) | 8.92 (1.35) | 8.48 (1.98) | 4.51 (1.30) |
| 2 weeks                  | Comparison   | 3.38 (13.01)  | 12.11 (14.98) | 9.00 (1.08) | 8.50 (1.82) | -           |
|                          | Experimental | .67 (.90)     | 15.19 (28.98) | 9.25 (1.11) | 8.20 (2.04) | -           |
| 3 weeks                  | Comparison   | .52 (.99)     | 10.55 (12.47) | 8.79 (1.31) | 8.74 (1.40) | -           |
|                          | Experimental | .58 (.96)     | 12.61 (23.82) | 9.04 (1.33) | 8.43 (2.40) | -           |
| 4 weeks                  | Comparison   | .82 (1.46)    | 21.33 (48.59) | 9.11 (1.24) | 8.42 (1.64) | 4.63 (1.39) |
|                          | Experimental | .84 (1.64)    | 9.90 (15.23)  | 8.95 (1.78) | 8.45 (2.19) | 4.32 (1.57) |
| 8 weeks                  | Comparison   | 2.42 (5.91)   | 16.53 (25.19) | 9.25 (1.00) | 8.06 (2.59) | -           |
|                          | Experimental | 4.37 (15.67)  | 8.72 (21.28)  | 8.68 (2.13) | 8.05 (3.20) | -           |
| 12 weeks                 | Comparison   | 14.40 (36.97) | 15.40 (29.11) | 9.06 (1.27) | 7.93 (2.89) | 4.73 (1.76) |
|                          | Experimental | 4.60 (8.16)   | 27.05 (38.97) | 9.00 (1.77) | 6.80 (3.23) | 3.98 (2.06) |
| 24 weeks                 | Comparison   | 3.47 (5.68)   | 24.33 (37.50) | 9.07 (1.87) | 6.07 (4.14) | 4.87 (2.07) |
|                          | Experimental | 9.71 (22.25)  | 13.36 (24.70) | 7.80 (3.05) | 7.07 (3.53) | 4.03 (2.17) |

Note: AEF = Awareness Efficacy; MCEF = Manage Cravings Efficacy; CCM = Cravings Control Management. There were no significant between group differences detected in the means
